# Supplementary material
Source: HighWire-hosted journal article supplement (https://bjgp.org/highwire/filestream/44534/field_highwire_adjunct_files/0/BJGP-2021-0668_suppl.pdf)
Supplement: BJGP-2021-0668_suppl.pdf [file BJGP-2021-0668_suppl.pdf]

## Box S1 - Interview guide

Note: At the beginning of phone contact the participant information statement will be discussed first, and verbal consent will be obtained prior to the interview.

### Melanoma and skin cancer care

1. Can you tell me about caring for patients with melanoma and skin cancer in your practice?
2. How often do you see patients with melanoma and skin cancer?

### *Combining individual melanoma risk factors to estimate overall melanoma risk*

1. How do you assess melanoma risk in your patients?  
[Individual or combination of risk factors]  
[How much weight do you give to the individual risk factors]  
[How do you combine the individual risk factors to give a combined risk]
2. How do you explain melanoma risk to your patients?  
[Absolute and/or relative risks]
3. Which resources have you used to assist with assessing melanoma risk?  
[RACGP guidelines for preventive activities in general practice,<sup>1</sup> Clinical practice guidelines for the management of melanoma in Australia and New Zealand,<sup>10</sup> DermNet<sup>11</sup> and others]  
Do you find these resources helpful?  
How are these resources helpful?
4. Do you see a role for melanoma risk prediction tools, which provide an estimate of melanoma risk based on a combination of individual risk factors?  
How do you see these being used?
5. We have devised a melanoma risk prediction tool. This allows patients to self-assess their melanoma risk factors.  
Do you see this as potentially useful in general practice?

### *Conceptualisation of risk*

6. Which method of explaining melanoma risk do you find more helpful? Why?  
[Absolute and/or relative risk]

### *Melanoma prevention interventions*

7. What interventions do you offer your patients?
8. How do you decide on these interventions?

### *Choice of risk thresholds for melanoma prevention interventions*

9. Is there a risk threshold (cut-off points) that you use for recommending interventions for melanoma prevention?  
[Prompt with various absolute and relative risk]
10. How do you decide on these risk thresholds (cut-off points) for recommending interventions for melanoma prevention?  
[What do you consider in deciding on risk threshold?]

11. Do you use a risk threshold (cut-off points) for recommending prevention intervention for other diseases?
12. How do you decide on these risk thresholds (cut-off points) for recommending interventions for other diseases?

**Version dated: 20 March 2019**
